# Supplementary figures and images for: 3D multiplexed immunoplasmonics microscopy
Source: Royal Society of Chemistry journal article supplement (doi:10.1039/c6nr01257d), 2016-01-01

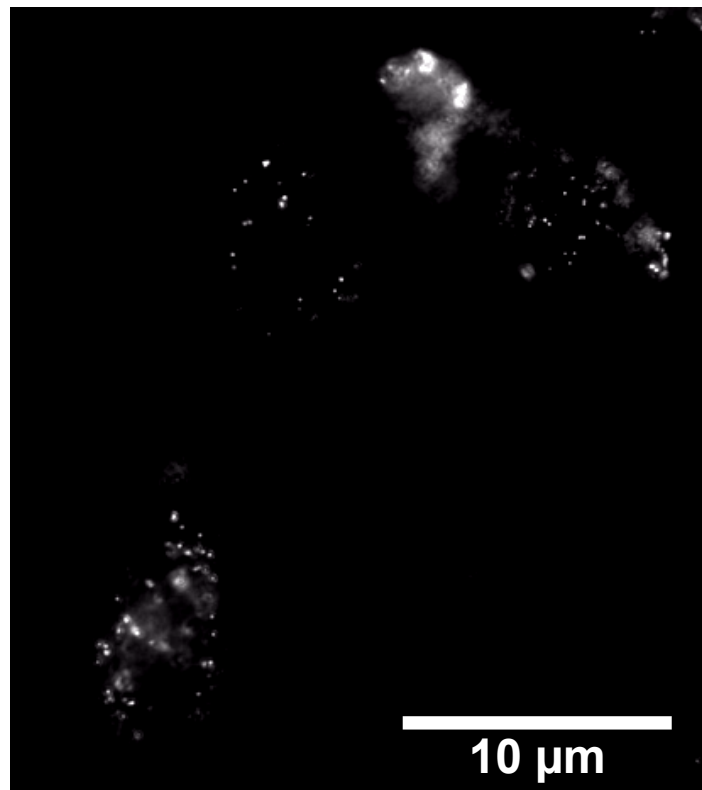

Supplement: c6nr01257d3.pdf [file c6nr01257d3.pdf]
